# Supplementary material
Source: publisher figshare collection journal article supplement (https://sage.figshare.com/ndownloader/files/23681482)
Supplement: Supplementary file 1 [file 23681482]

Supplemental table 4 Newcastle-Ottawa Scale for Case-control studies

| Study                    | Selection                        |                                 |                       | Comparability          |                        |                                          | Exposure                  |                                                     |                   | Score |
|--------------------------|----------------------------------|---------------------------------|-----------------------|------------------------|------------------------|------------------------------------------|---------------------------|-----------------------------------------------------|-------------------|-------|
|                          | Is the Case Definition Adequate? | Representativeness of the Cases | Selection of Controls | Definition of Controls | Study controls for age | Study controls for any additional factor | Ascertainment of Exposure | Same method of ascertainment for cases and controls | Non-Response rate |       |
| Sandstede, et al. (2000) | 1                                | 0                               | 0                     | 1                      | 1                      | 1                                        | 0                         | 1                                                   | 1                 | 6     |
